# Supplementary material for: Imprint of Southern Ocean eddies on chlorophyll
Source: Copernicus journal article supplement (doi:10.5194/bg-2018-70), 2018-02-16
Supplement: Supplementary file 1 [file bg-2018-70-supplement.pdf]

## 1 Supplementary Figures

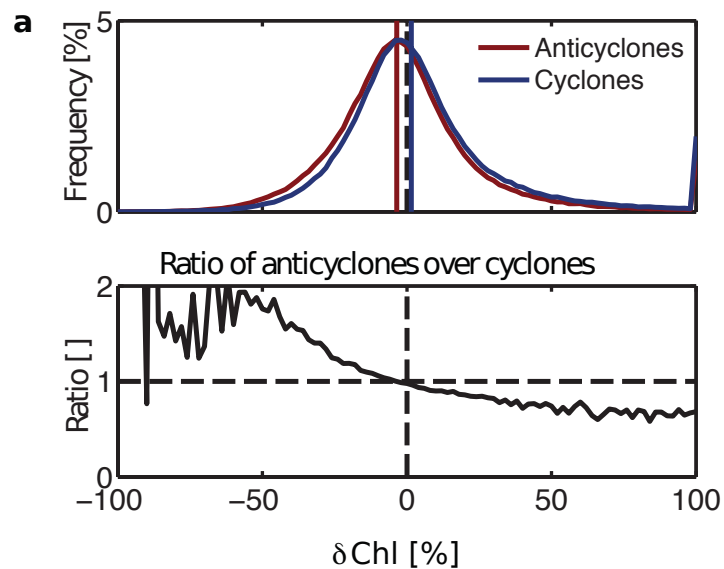

**Figure S1. Chlorophyll anomaly ( $\delta\text{Chl}$ ) distribution associated with eddies;** (upper panel) distribution of  $\delta\text{Chl}$  (based on 2% bins) of eddies existing 3 weeks or longer; vertical colored lines mark the mean; (lower panel) shows the ratio of the two distributions, with anticyclones over cyclones.

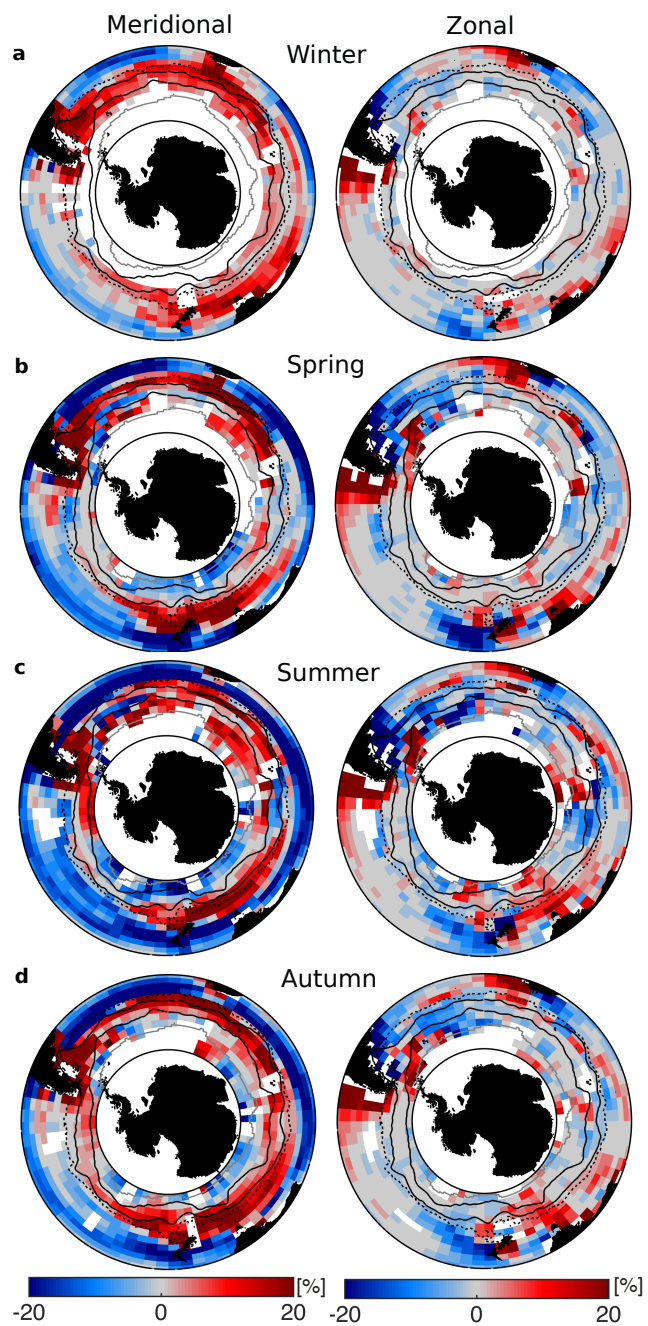

**Figure S2. Seasonality of climatological chlorophyll (Chl) gradients; Austral a winter, b spring, c summer and d autumn; meridional gradient (left) and zonal gradient (right). Otherwise as Figure 2.**

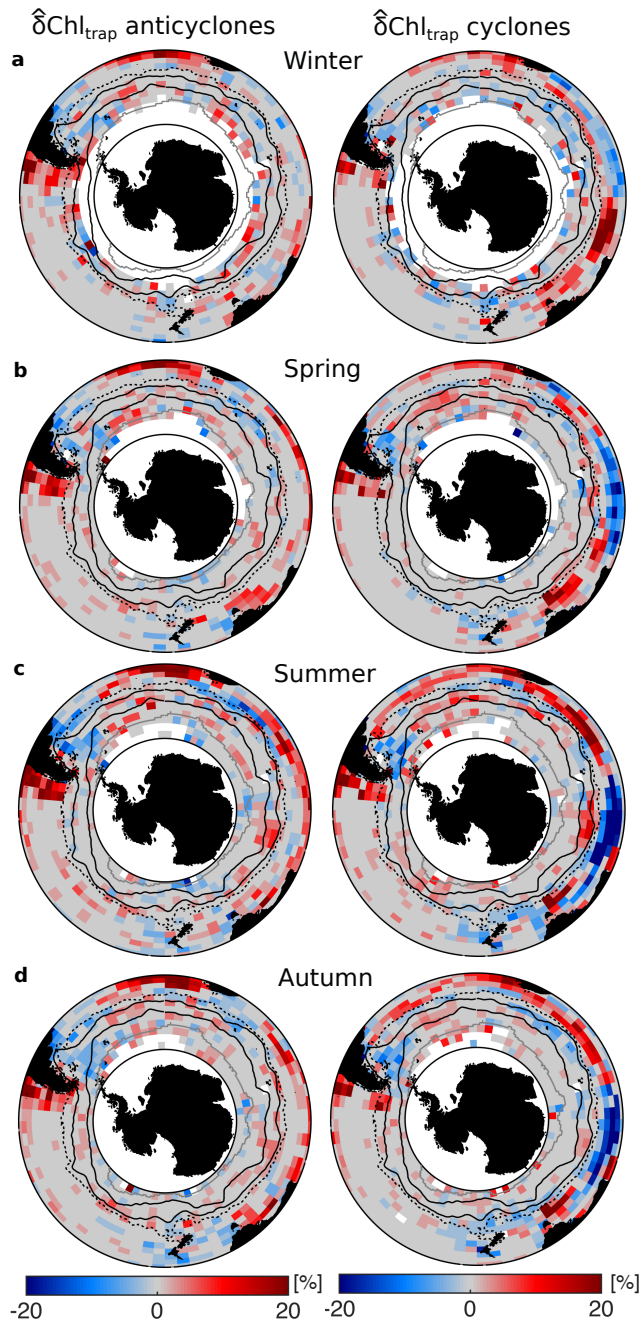

**Figure S3. Seasonality of trapping potential of eddies ( $\hat{\delta}\text{Chl}_{\text{trap}}$ );** Austral **a** winter, **b** spring, **c** summer and **d** autumn for anticyclones (left) and cyclones (right). Otherwise as Figure 2.
